# Supplementary material for: Mixed methods process evaluation of the Sundara Grama intervention promoting latrine use and safe disposal in rural Odisha, India
Source: Research Square preprint supplement (doi:10.21203/rs.3.rs-496628/v1), 2021-05-13
Supplement: Supplementary file 1 [file 94a9e2ecb54a632df0464b58.docx]

**
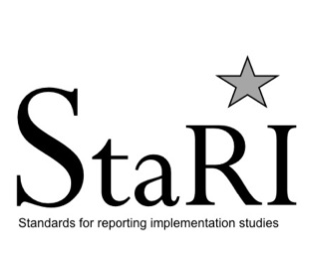
Standards for Reporting Implementation Studies: the StaRI checklist for completion**

The StaRI standard should be referenced as: Pinnock H, Barwick M, Carpenter C, Eldridge S, Grandes G, Griffiths CJ, Rycroft-Malone J, Meissner P, Murray E, Patel A, Sheikh A, Taylor SJC for the StaRI Group. Standards for Reporting Implementation Studies [(StaRI) statement](http://www.bmj.com/content/356/bmj.i6795.full). *BMJ* 2017;356:i6795

The detailed Explanation and Elaboration document, which provides the rationale and exemplar text for all these items is: Pinnock H, Barwick M, Carpenter C, Eldridge S, Grandes G, Griffiths C, Rycroft-Malone J, Meissner P, Murray E, Patel A, Sheikh A, Taylor S, for the StaRI group. Standards for Reporting Implementation Studies [(StaRI). Explanation and Elaboration document](http://bmjopen.bmj.com/content/7/4/e013318.full?ijkey=vv4LKZxc25YcLJv&keytype=ref). *BMJ Open* 2017 2017;7:e013318

Notes:A key concept of the StaRI standards is the dual strands of describing, on the one hand, the implementation strategy and, on the other, the clinical, healthcare, or public health intervention that is being implemented. These strands are represented as two columns in the checklist.

| The primary focus of implementation science is the implementation strategy (column 1) and the expectation is that this will always be completed. | The evidence about the impact of the intervention on the targeted population should always be considered (column 2) and either health outcomes reported or robust evidence cited to support a known beneficial effect of the intervention on the health of individuals or populations. |
| --- | --- |

The StaRI standardsrefers to the broad range of study designs employed in implementation science. Authors should refer to other reporting standards for advice on reporting specific methodological features. Conversely, whilst all items are worthy of consideration, not all items will be applicable to, or feasible within every study.

| **Checklist item** | | **Reported on page #** | **Implementation Strategy** | **Reported on page #** | **Intervention** |
| --- | --- | --- | --- | --- | --- |
|  | |  | “Implementation strategy” refers to how the intervention was implemented |  | “Intervention” refers to the healthcare or public health intervention that is being implemented. |
| **Title and abstract** | | | | | |
| Title | **1** | Pg 1 | Identification as an implementation study, and description of the methodology in the title and/or keywords | | |
| Abstract | **2** | Pg 2 | Identification as an implementation study, including a description of the implementation strategy to be tested, the evidence-based intervention being implemented, and defining the key implementation and health outcomes. | | |
| **Introduction** | | | | | |
| Introduction | **3** | Pg 3 | Description of the problem, challenge or deficiency in healthcare or public health that the intervention being implemented aims to address. | | |
| Rationale | **4** | Pgs 5-6 | The scientific background and rationale for the implementation strategy (including any underpinning theory/framework/model, how it is expected to achieve its effects and any pilot work). | Pg 3 (effectiveness of intervention)  Pg 5 (background on intervention) | The scientific background and rationale for the intervention being implemented (including evidence about its effectiveness and how it is expected to achieve its effects). |
| Aims and objectives | **5** | Pg 4 | The aims of the study, differentiating between implementation objectives and any intervention objectives. | | |
| **Methods: description** | | | | | |
| Design | **6** | Pg 4 (approach) | The design and key features of the evaluation, (cross referencing to any appropriate methodology reporting standards) and any changes to study protocol, with reasons | | |
| Context | **7** | Pg 5 (context and sample) | The context in which the intervention was implemented. (Consider social, economic, policy, healthcare, organisational barriers and facilitators that might influence implementation elsewhere). | | |
| Targeted ‘sites’ | **8** | Pg 6 (context and sample) | The characteristics of the targeted ‘site(s)’ (e.g locations/personnel/resources etc.) for implementation and any eligibility criteria. | Pg 6 (context and sample) | The population targeted by the intervention and any eligibility criteria. |
| Description | **9** | Pgs. 5 – 6 (Sundara Grama sanitation intervention) | A description of the implementation strategy | Pgs. 5 – 6 (Sundara Grama sanitation intervention) | A description of the intervention |
| Sub-groups | **10** | None | Any sub-groups recruited for additional research tasks, and/or nested studies are described | | |
| **Methods: evaluation** | | | | | |
| Outcomes | **11** | Pg 4 (questions / process eval components assessed); pgs 6 – 9 (detailed description of quant and qual data collection) | Defined pre-specified primary and other outcome(s) of the implementation strategy, and how they were assessed. Document any pre-determined targets | Not assessed in this paper (but reference given to trial results on pg 3) | Defined pre-specified primary and other outcome(s) of the intervention (if assessed), and how they were assessed. Document any pre-determined targets |
| Process evaluation | **12** | Same as #11 above | Process evaluation objectives and outcomes related to the mechanism by which the strategy is expected to work | | |
| Economic evaluation | **13** | Pgs 11-12 (cost analysis) | Methods for resource use, costs, economic outcomes and analysis for the implementation strategy | Pg 11-12  (cost analysis) | Methods for resource use, costs, economic outcomes and analysis for the intervention |
| Sample size | **14** | pgs 6 – 9 (detailed description of quant and qual data collection samples, Table 2) | Rationale for sample sizes (including sample size calculations, budgetary constraints, practical considerations, data saturation, as appropriate) | | |
| Analysis | **15** | Pgs 9 – 11 (quant and qual analysis approaches) | Methods of analysis (with reasons for that choice) | | |
| Sub-group analyses | **16** | Pg 11 (One-way ANOVA sub-analysis to compare delivery teams) | Any a priori sub-group analyses (e.g. between different sites in a multicentre study, different clinical or demographic populations), and sub-groups recruited to specific nested research tasks | | |

| **Results** | | | | | |
| --- | --- | --- | --- | --- | --- |
| Characteristics | **17** | Pgs 13 – 14 (reach and recruitment) | Proportion recruited and characteristics of the recipient population for the implementation strategy | Pgs 13 – 14 (reach and recruitment) | Proportion recruited and characteristics (if appropriate) of the recipient population for the intervention |
| Outcomes | **18** | Pgs. 12 to 14 (main results) | Primary and other outcome(s) of the implementation strategy | Not assessed in this study | Primary and other outcome(s) of the Intervention (if assessed) |
| Process outcomes | **19** | Same as #18 above | Process data related to the implementation strategy mapped to the mechanism by which the strategy is expected to work | | |
| Economic evaluation | **20** | Pg 19 (cost analysis) | Resource use, costs, economic outcomes and analysis for the implementation strategy | Pg 19 (cost analysis) | Resource use, costs, economic outcomes and analysis for the intervention |
| Sub-group analyses | **21** | ANOVA subanalysis results on pgs 12 -13 | Representativeness and outcomes of subgroups including those recruited to specific research tasks | | |
| Fidelity/ adaptation | **22** | Pg 12 (fidelity and dose delivered) | Fidelity to implementation strategy as planned and adaptation to suit context and preferences | Pg 12 (fidelity and dose delivered) | Fidelity to delivering the core components of intervention (where measured) |
| Contextual changes | **23** | Pgs 15-16 (context) | Contextual changes (if any) which may have affected outcomes | | |
| Harms | **24** | Pg2 16-18 (negative experiences for participants and implementers) | All important harms or unintended effects in each group | | |
| **Discussion** | | | | | |
| Structured discussion | **25** | Pgs 20-24 (discussion) | Summary of findings, strengths and limitations, comparisons with other studies, conclusions and implications | | |
| Implications | **26** | Pgs 20-24 (discussion) | Discussion of policy, practice and/or research implications of the implementation strategy (specifically including scalability) | Pgs 20-24 (discussion) | Discussion of policy, practice and/or research implications of the intervention (specifically including sustainability) |
| **General** | | | | | |
| Statements | **27** | Pg 25 (ethics approval and consent to participate); pf 25 (completing interests), pg 26 (funding) | Include statement(s) on regulatory approvals (including, as appropriate, ethical approval, confidential use of routine data, governance approval), trial/study registration (availability of protocol), funding and conflicts of interest | | |
